# Supplementary material for: Co-infection of Fusarium aglaonematis sp. nov. and Fusarium elaeidis Causing Stem Rot in Aglaonema modestum in China
Source: PubMed Central journal article supplement (PMC9279562; doi:10.3389/fmicb.2022.930790), 2022-06-30
Supplement: Table_1.pdf [file Table_1.pdf]

## Supplementary Material

**Supplementary Table 1** Strains of *Fusarium fujikuroi* species complex used in phylogenetic analysis

| Species                 | Culture collection number | GenBank accession number |                 |                 |                 |                 |
|-------------------------|---------------------------|--------------------------|-----------------|-----------------|-----------------|-----------------|
|                         |                           | <i>tefl</i>              | <i>tub2</i>     | <i>cmdA</i>     | <i>rpb2</i>     | <i>rpb1</i>     |
| <i>F. acutatum</i>      | CBS 401.97                | MW402124                 | MW402322        | MW402458        | MW402813        | MW402652        |
|                         | CBS 402.97 <sup>T</sup>   | MW402125                 | MW402323        | MW402459        | MW402768        | MW402653        |
|                         | CBS 739.97                | AF160276                 | MW402348        | AF158329        | MN193883        | MW402696        |
| <i>F. agapanthi</i>     | CBS 100193                | MW401959                 | MW402160        | MW402363        | MW402727        | MW402491        |
|                         | NRRL 54463 <sup>T</sup>   | KU900630                 | KU900635        | KU900611        | KU900625        | KU900620        |
|                         | NRRL 54464                | MN193856                 | KU900637        | KU900613        | KU900627        | MW402718        |
| <i>F. aglaonemae</i>    | <b>ZHKUCC 22-0077</b>     | <b>ON330437</b>          | <b>ON330440</b> | <b>ON330434</b> | <b>ON330443</b> | <b>ON330446</b> |
|                         | <b>ZHKUCC 22-0078</b>     | <b>ON330438</b>          | <b>ON330441</b> | <b>ON330435</b> | <b>ON330444</b> | <b>ON330447</b> |
|                         | <b>ZHKUCC 22-0079</b>     | <b>ON330439</b>          | <b>ON330442</b> | <b>ON330436</b> | <b>ON330445</b> | <b>ON330448</b> |
| <i>F. ananatum</i>      | CBS 118516 <sup>T</sup>   | LT996091                 | MN534089        | MW402376        | LT996137        | MW402507        |
|                         | CBS 118517                | MN533988                 | MN534090        | MN534157        | MN534229        | MW402508        |
|                         | CBS 184.29                | MW402105                 | MW402303        | MW402445        | MW402809        | MW402629        |
| <i>F. andiyazi</i>      | CBS 119856                | MN533989                 | MN534081        | MN534174        | MN534286        | MW402523        |
|                         | CBS 119857 <sup>T</sup>   | MN193854                 | LT996113        | MN534175        | LT996138        | MW402524        |
| <i>F. annulatum</i>     | CBS 115.97                | MW401973                 | MW402173        | MW402373        | MW402785        | MW402503        |
|                         | CBS 258.54 <sup>T</sup>   | MT010994                 | MT011041        | MT010908        | MT010983        | MT010944        |
|                         | CBS 135.95                | MW402043                 | MW402242        | MW402408        | MW402745        | MW402571        |
| <i>F. anthophilum</i>   | CBS 119858                | MN533990                 | MN534091        | MN534158        | MN534232        | MW402525        |
|                         | CBS 119859                | MN533991                 | MN534092        | MN534164        | MN534233        | MW402526        |
|                         | CBS 222.76 <sup>ET</sup>  | MW402114                 | MW402312        | MW402451        | MW402811        | MW402641        |
| <i>F. aquaticum</i>     | LC13615                   | MW580446                 | MW533728        | MW566273        | MW474392        | MW024437        |
|                         | LC13616                   | MW580447                 | MW533729        | MW566274        | MW474393        | MW024438        |
|                         | LC7502 <sup>T</sup>       | MW580448                 | MW533730        | MW566275        | MW474394        | MW024439        |
| <i>F. awaxy</i>         | CBS 119831                | MN534056                 | MN534108        | MN534167        | MN534237        | MW402514        |
|                         | CBS 119832                | MN534057                 | MN534106        | MN534170        | MN534240        | MW402515        |
| <i>F. bactridioides</i> | CBS 100057 <sup>T</sup>   | MN533993                 | MN534112        | MN534173        | MN534235        | MW402490        |
|                         | NRRL 20476                | AF160290                 | U34434          | AF158343        | –               | –               |

Supplementary Table 1 (Continued)

| Species                    | Culture collection number | GenBank accession number |             |             |             |             |
|----------------------------|---------------------------|--------------------------|-------------|-------------|-------------|-------------|
|                            |                           | <i>tefl</i>              | <i>tub2</i> | <i>cmdA</i> | <i>rpb2</i> | <i>rpb1</i> |
| <i>F. begoniae</i>         | CBS 403.97                | MN193858                 | U61543      | MW402460    | MN193886    | MW402654    |
|                            | CBS 452.97 <sup>T</sup>   | MN533994                 | MN534101    | MN534163    | MN534243    | MW402675    |
| <i>F. brevicatenulatum</i> | CBS 404.97 <sup>T</sup>   | MN533995                 | MN534063    | –           | MN534295    | MW402655    |
|                            | CBS 100196                | MN193859                 | –           | –           | MN193887    | MW402492    |
| <i>F. bulbicola</i>        | CBS 220.76 <sup>T</sup>   | KF466415                 | KF466437    | MW402450    | MW402767    | –           |
| <i>F. chinhoiense</i>      | NRRL 25221 <sup>T</sup>   | MN534050                 | MN534082    | MN534196    | MN534262    | MW402711    |
|                            | NY 001B5                  | MN534051                 | MN534083    | MN534197    | MN534263    | MW402725    |
| <i>F. circinatum</i>       | CBS 405.97 <sup>T</sup>   | MN533997                 | MN534097    | MN534199    | MN534252    | MW402656    |
|                            | CBS 141671                | MW402083                 | MW402282    | MW402427    | MW402807    | MW402610    |
|                            | CBS 119864                | MW401996                 | MW402196    | MW402389    | MW402736    | MW402528    |
| <i>F. coicis</i>           | NRRL 66233 <sup>T</sup>   | KP083251                 | LT996115    | LT996178    | KP083274    | –           |
| <i>F. concentricum</i>     | CBS 450.97 <sup>T</sup>   | AF160282                 | MW402334    | MW402467    | JF741086    | MW402674    |
|                            | CBS 453.97                | MN533998                 | MN534123    | MN534216    | MN534264    | MW402676    |
| <i>F. denticulatum</i>     | CBS 406.97                | MN533999                 | MN534067    | MN534185    | MN534273    | MW402657    |
|                            | CBS 407.97 <sup>T</sup>   | MN534000                 | MN534068    | MN534186    | MN534274    | MW402658    |
|                            | CBS 735.97                | AF160269                 | U61550      | AF158322    | LT996143    | –           |
| <i>F. dlaminii</i>         | CBS 671.94                | MN534004                 | MN534136    | MN534152    | MN534254    | MW402690    |
|                            | CBS 672.94                | MN534005                 | MN534137    | MN534153    | MN534255    | MW402691    |
|                            | CBS 119860 <sup>T</sup>   | MW401995                 | MW402195    | MW402388    | KU171701    | KU171681    |
| <i>F. echinatum</i>        | CBS 146496                | MW834272                 | MW834300    | MW834109    | MW834003    | MW834186    |
|                            | CBS 146497 <sup>T</sup>   | MW834273                 | MW834301    | MW834110    | MW834004    | MW834187    |
| <i>F. elaeagni</i>         | LC13627 <sup>T</sup>      | MW580466                 | MW533748    | MW566293    | MW474412    | MW024457    |
|                            | LC13628                   | MW580467                 | MW533749    | MW566294    | MW474413    | MW024458    |
|                            | LC13629                   | MW580468                 | MW533750    | MW566295    | MW474414    | MW024459    |
| <i>F. ficicrescens</i>     | CBS 125177                | MN534006                 | MN534071    | MN534176    | MN534281    | MW402545    |
|                            | CBS 125178 <sup>T</sup>   | KU604452                 | KP662896    | KU603958    | KT154002    | MW402546    |
|                            | CBS 125181                | MN534007                 | MN534072    | MN534177    | MN534282    | MW402548    |
| <i>F. fractiflexum</i>     | NRRL 28852 <sup>T</sup>   | AF160288                 | AF160315    | AF158341    | LT575064    | –           |
| <i>F. fredkrugeri</i>      | CBS 408.97                | MW402126                 | MW402324    | MW402461    | MW402814    | –           |
|                            | CBS 144209 <sup>T</sup>   | LT996097                 | LT996118    | LT996181    | LT996147    | LT996199    |
|                            | CBS 144495                | LT996096                 | LT996117    | LT996180    | LT996146    | LT996198    |

Supplementary Table 1 (Continued)

| Species                    | Culture collection number | GenBank accession number |             |             |             |             |
|----------------------------|---------------------------|--------------------------|-------------|-------------|-------------|-------------|
|                            |                           | <i>tefl</i>              | <i>tub2</i> | <i>cmdA</i> | <i>rpb2</i> | <i>rpb1</i> |
| <i>F. fujikuroi</i>        | CBS 221.76 <sup>T</sup>   | MN534010                 | MN534130    | –           | KU604255    | MW402640    |
|                            | CBS 257.52                | MW402119                 | MW402317    | MW402454    | MW402812    | MW402645    |
|                            | CBS 265.54                | MN534011                 | MN534132    | MN534222    | MN534268    | MW402650    |
| <i>F. globosum</i>         | CBS 428.97 <sup>T</sup>   | KF466417                 | MN534124    | MN534218    | KF466406    | MW402668    |
|                            | CBS 430.97                | MN534013                 | MN534125    | MN534219    | MN534265    | –           |
| <i>F. globosum</i> (cont.) | CBS 120992                | MW401998                 | MW402198    | MW402390    | MW402788    | MW402529    |
| <i>F. guttiforme</i>       | CBS 409.97 <sup>T</sup>   | MT010999                 | MT011048    | MT010901    | MT010967    | MT010938    |
|                            | NRRL 22945                | AF160297                 | U34420      | AF158350    | JX171618    | JX171505    |
| <i>F. hechiense</i>        | LC13644 <sup>T</sup>      | MW580494                 | MW533773    | MW566321    | MW474440    | MW024482    |
|                            | LC13645                   | MW580495                 | MW533774    | MW566322    | MW474441    | MW024483    |
|                            | LC13646                   | MW580496                 | MW533775    | MW566323    | MW474442    | MW024484    |
| <i>F. konzum</i>           | CBS 119849 <sup>T</sup>   | LT996098                 | MN534095    | LT996182    | MW402733    | MW402519    |
|                            | CBS 139382                | MW402071                 | MW402270    | MW402418    | MW402804    | MW402598    |
|                            | CBS 139383                | MN534014                 | MN534094    | MN534200    | MN534244    | MW402599    |
| <i>F. lactis</i>           | CBS 411.97 <sup>ET</sup>  | MN193862                 | MN534077    | MN534178    | MN534275    | MW402659    |
|                            | CBS 420.97                | MN534015                 | MN534078    | MN534181    | MN534296    | MW402667    |
| <i>F. longicornicola</i>   | NRRL 52706 <sup>T</sup>   | JF740788                 | MW402360    | MW402487    | JF741114    | –           |
|                            | NRRL 52712                | JF740794                 | MW402361    | MW402488    | JF741120    | MW402716    |
|                            | NRRL 52713                | JF740795                 | MW402362    | MW402489    | JF741121    | MW402717    |
| <i>F. lumajangense</i>     | InaCCF872 <sup>T</sup>    | LS479441                 | LS479433    | –           | LS479850    | –           |
|                            | InaCCF993                 | LS479442                 | LS479434    | –           | LS479851    | –           |
| <i>F. madaense</i>         | CBS 146651                | MW402096                 | MW402295    | MW402437    | MW402762    | MW402617    |
|                            | CBS 146656                | MW402097                 | MW402296    | MW402438    | MW402763    | MW402618    |
|                            | CBS 146669 <sup>T</sup>   | MW402098                 | MW402297    | MW402439    | MW402764    | MW402619    |
| <i>F. mangiferae</i>       | CBS 119853                | MN534016                 | MN534140    | MN534225    | MN534270    | MW402522    |
|                            | CBS 120994 <sup>T</sup>   | MN534017                 | MN534128    | MN534224    | MN534271    | MW402530    |
|                            | NRRL 25226                | AF160281                 | U61561      | AF158334    | HM068353    | MW402712    |
| <i>F. mexicanum</i>        | NRRL 47473                | GU737416                 | GU737308    | GU737389    | LR792615    | LR792579    |
|                            | NRRL 53147 <sup>T</sup>   | GU737282                 | GU737494    | –           | MN724973    | MG838088    |
| <i>F. mundagurra</i>       | RGB5717 <sup>T</sup>      | KP083256                 | MN534146    | MN534214    | KP083276    | –           |
| <i>F. musae</i>            | CBS 624.87 <sup>T</sup>   | FN552086                 | FN545368    | MW402474    | MW402772    | MW402689    |
|                            | NRRL 28893                | FN552092                 | FN545374    | FN552070    | FN552114    | –           |

Supplementary Table 1 (Continued)

| Species                     | Culture collection number | GenBank accession number |             |             |             |             |
|-----------------------------|---------------------------|--------------------------|-------------|-------------|-------------|-------------|
|                             |                           | <i>tefl</i>              | <i>tub2</i> | <i>cmdA</i> | <i>rpb2</i> | <i>rpb1</i> |
| <i>F. napiforme</i>         | CBS 748.97 <sup>T</sup>   | MN193863                 | MN534085    | MN534192    | MN534291    | MW402701    |
|                             | CBS 135139                | MN534019                 | MN534084    | MN534183    | MN534290    | MW402572    |
|                             | CBS 135141                | MW402045                 | MW402244    | –           | MW402797    | MW402573    |
| <i>F. nirenbergiae</i>      | CBS 744.97                | AF160312                 | U34424      | AF158365    | LT575065    | –           |
| <i>F. nygamai</i>           | CBS 749.97 <sup>T</sup>   | MW402151                 | MW402352    | MW402479    | EF470114    | MW402703    |
|                             | CBS 834.85                | MW402154                 | MW402355    | MW402482    | MW402821    | MW402707    |
|                             | CBS 119852                | MW401992                 | MW402192    | MW402386    | MW402734    | MW402521    |
| <i>F. ophioides</i>         | CBS 118512 <sup>T</sup>   | MN534022                 | MN534118    | MN534209    | MN534303    | –           |
|                             | CBS 118513                | MN534023                 | MN534119    | MN534202    | MN534300    | –           |
|                             | CBS 118514                | MN534024                 | MN534117    | MN534206    | MN534302    | –           |
| <i>F. panlongense</i>       | LC13656 <sup>T</sup>      | MW580510                 | MW533789    | MW566337    | MW474456    | MW024498    |
|                             | MUCL 55958                | LT574913                 | LT575078    | LT575159    | LT574994    | –           |
|                             | MUCL 55950                | LT574905                 | LT575070    | LT575151    | LT574986    | –           |
|                             | MUCL 55954                | LT574909                 | LT575074    | LT575155    | LT574990    | –           |
| <i>F. parvisorum</i>        | CMW 25267 <sup>T</sup>    | KJ541060                 | KJ541055    | –           | –           | –           |
| <i>F. phyllophilum</i>      | CBS 216.76 <sup>T</sup>   | MN193864                 | KF466443    | KF466333    | KF466410    | MW402637    |
|                             | CBS 246.61                | MW402118                 | MW402316    | MW402453    | –           | MW402644    |
| <i>F. pilosicola</i>        | NRRL 29123                | MN534054                 | MN534098    | MN534165    | MN534247    | –           |
|                             | NRRL 29124 <sup>T</sup>   | MN534055                 | MN534099    | MN534159    | MN534248    | –           |
| <i>F. prieskaense</i>       | CPC 30825                 | MW834274                 | MW834302    | MW834111    | MW834006    | MW834189    |
|                             | CBS 146498 <sup>T</sup>   | MW834275                 | MW834303    | MW834112    | MW834007    | MW834190    |
|                             | CBS 146499                | MW834276                 | MW834304    | MW834113    | MW834008    | MW834191    |
| <i>F. proliferatum</i>      | CBS 480.96E <sup>T</sup>  | MN534059                 | MN534129    | MN534217    | MN534272    | –           |
| <i>F. pseudoanthophilum</i> | CBS 414.97 <sup>T</sup>   | MW402128                 | MW402326    | MW402463    | –           | MW402661    |
|                             | CBS 745.97                | MW402148                 | MW402349    | MW402476    | MW402820    | MW402697    |
| <i>F. pseudocircinatum</i>  | CBS 449.97 <sup>T</sup>   | AF160271                 | MN534069    | MN534190    | MN534277    | MW402673    |
|                             | CBS 455.97                | MN534029                 | MN534070    | MN534184    | MN534276    | –           |
| <i>F. pseudonygamai</i>     | CBS 416.97                | MN534030                 | MN534064    | MN534194    | MN534283    | MW402663    |
|                             | CBS 417.97 <sup>T</sup>   | AF160263                 | MN534066    | AF158316    | MN534285    | MW402664    |
|                             | CBS 484.94                | MN534031                 | MN534065    | MN534195    | MN534284    | MW402681    |
| <i>F. ramigenum</i>         | CBS 418.97 <sup>T</sup>   | KF466423                 | MN534145    | MN534187    | KF466412    | MW402665    |

Supplementary Table 1 (Continued)

| Species                          | Culture collection number | GenBank accession number |             |             |             |             |
|----------------------------------|---------------------------|--------------------------|-------------|-------------|-------------|-------------|
|                                  |                           | <i>tefl</i>              | <i>tub2</i> | <i>cmdA</i> | <i>rpb2</i> | <i>rpb1</i> |
| <i>F. ramigenum</i>              | CBS 526.97                | MN534032                 | MN534086    | MN534188    | MN534292    | MW402682    |
| <i>F. sacchari</i>               | CBS 223.76 <sup>ET</sup>  | MW402115                 | MW402313    | AF158331    | JX171580    | –           |
|                                  | CBS 131372                | MN534033                 | MN534134    | MN534226    | MN534293    | MW402560    |
|                                  | CBS 131370                | MW402031                 | MW402230    | MW402404    | MW402793    | MW402558    |
| <i>F. secorum</i>                | NRRL 62593 <sup>T</sup>   | KJ189225                 | –           | KJ189235    | –           | –           |
|                                  | NRRL 62594                | KJ189228                 | –           | KJ189238    | –           | –           |
| <i>F. siculi</i>                 | CBS 142222 <sup>T</sup>   | LT746214                 | LT746346    | LT746189    | LT746327    | –           |
|                                  | CPC 27189                 | LT746215                 | LT746347    | LT746190    | LT746328    | –           |
| <i>F. sterilihyposum</i>         | NRRL 25623 <sup>T</sup>   | MN193869                 | AF160316    | AF158353    | MN193897    | MW402713    |
| <i>F. Sterilihyposum</i> (cont.) | NRRL 53991                | GU737413                 | GU737305    | GU737386    | –           | –           |
|                                  | NRRL 53997                | GU737414                 | GU737306    | GU737387    | –           | –           |
| <i>F. subglutinans</i>           | CBS 536.95                | MW402139                 | MW402339    | MW402471    | MW402836    | MW402685    |
|                                  | CBS 747.97 <sup>NT</sup>  | MW402150                 | MW402351    | MW402478    | MW402773    | MW402700    |
|                                  | CBS 136481                | MW402059                 | MW402258    | MW402413    | MW402748    | MW402585    |
| <i>F. succisae</i>               | CBS 187.34                | MW402109                 | MW402307    | MW402448    | MW402810    | –           |
|                                  | CBS 219.76 <sup>ET</sup>  | AF160291                 | U34419      | AF158344    | MW402766    | MW402639    |
| <i>F. sudanense</i>              | CBS 454.97 <sup>T</sup>   | MN534037                 | MN534073    | MN534179    | MN534278    | MW402677    |
|                                  | CBS 675.94                | MN534038                 | MN534074    | MN534182    | MN534279    | MW402693    |
| <i>F. temperatum</i>             | CBS 135538                | MN534039                 | MN534111    | MN534168    | MN534239    | MW402575    |
|                                  | CBS 135539                | MN534040                 | MN534110    | MN534169    | MN534242    | MW402576    |
|                                  | MUCL 52463 <sup>T</sup>   | –                        | MW402359    | MW402486    | MW402776    | –           |
| <i>F. terricola</i>              | CBS 483.94 <sup>T</sup>   | MN534042                 | MN534076    | MN534189    | LT996156    | MW402680    |
|                                  | CBS 119850                | MN534041                 | MN534075    | MN534180    | MN534280    | MW402520    |
| <i>F. thapsinum</i>              | CBS 776.96 <sup>T</sup>   | MN534044                 | MN534080    | –           | MN534289    | MW402704    |
|                                  | CBS 100312                | MW401961                 | MW402162    | MW402365    | MW402780    | MW402494    |
|                                  | CBS 100313                | MW401962                 | MW402163    | MW402366    | MW402781    | MW402495    |
| <i>F. tjaetaba</i>               | NRRL 66243 <sup>T</sup>   | KP083263                 | GU737296    | LT996187    | KP083275    | –           |
| <i>F. tupiense</i>               | CML345                    | DQ452861                 | DQ445783    | –           | –           | –           |
| <i>F. udum</i>                   | CBS 178.32                | AF160275                 | U34433      | MW402442    | LT996172    | MW402624    |
|                                  | CBS 747.79                | MN193872                 | MN534141    | MN534154    | MN534258    | MW402699    |
| <i>F. verticillioides</i>        | CBS 125.73                | MW402012                 | MW402212    | MW402392    | MW402791    | MW402543    |
| <i>F. verticillioides</i>        | CBS 447.95                | MW402133                 | MW402332    | MW402466    | MW402770    | MW402671    |

**Supplementary Table 1** (Continued)

| Species                   | Culture collection number | GenBank accession number |             |             |             |             |
|---------------------------|---------------------------|--------------------------|-------------|-------------|-------------|-------------|
|                           |                           | <i>tefl</i>              | <i>tub2</i> | <i>cmdA</i> | <i>rpb2</i> | <i>rpb1</i> |
| <i>F. verticillioides</i> | CBS 531.95                | MW402136                 | MW402336    | MW402468    | MW402771    | MW402683    |
| <i>F. volatile</i>        | CBS 143874 <sup>T</sup>   | LR596007                 | LR596008    | MK984595    | LR596006    | –           |
| <i>F. volatile</i>        | NRRL 25615                | AF160304                 | AF160320    | AF158357    | –           | –           |
| <i>F. werrikimbe</i>      | CBS 125535 <sup>T</sup>   | –                        | MN534104    | MN534203    | MN534304    | –           |
| <i>F. xylarioides</i>     | CBS 258.52 <sup>T</sup>   | MN193874                 | AY707118    | MW402455    | HM068355    | MW402646    |
| <i>F. xylarioides</i>     | CBS 749.79                | MN534049                 | MN534143    | AF158326    | MN534259    | MW402702    |
| <i>F. xyrophilum</i>      | NRRL 62710                | MN193875                 | –           | –           | MN193903    | MW402720    |
|                           | NRRL 62721 <sup>T</sup>   | MN193877                 | –           | –           | MN193905    | MW402721    |

The isolates obtained in this study are bold.  
T=Ex-type specimen. ET=Ex-epitype specimen.
