# Supplementary material for: Co-infection of Fusarium aglaonematis sp. nov. and Fusarium elaeidis Causing Stem Rot in Aglaonema modestum in China
Source: PubMed Central journal article supplement (PMC9279562; doi:10.3389/fmicb.2022.930790), 2022-06-30
Supplement: Table_2.pdf [file Table_2.pdf]

## Supplementary Material

Supplementary Table 2 Strains of *Fusarium oxysporum* species complex used in phylogenetic analysis

| Species name                | Culture collection number | GenBank accession number |                 |                 |
|-----------------------------|---------------------------|--------------------------|-----------------|-----------------|
|                             |                           | <i>rpb2</i>              | <i>tef1</i>     | <i>tub2</i>     |
| <i>Fusarium callistephi</i> | CBS 187.53 <sup>T</sup>   | MH484875                 | MH484966        | MH485057        |
|                             | CBS 115423                | MH484905                 | MH484996        | MH485087        |
| <i>F. carminascens</i>      | CBS 144739                | MH484934                 | MH485025        | MH485116        |
|                             | CBS 144740                | MH484935                 | MH485026        | MH485117        |
|                             | CBS 144741                | MH484936                 | MH485027        | MH485118        |
| <i>F. contaminatum</i>      | CBS 111552                | MH484900                 | MH484991        | MH485082        |
|                             | CBS 114899 <sup>T</sup>   | MH484901                 | MH484992        | MH485083        |
|                             | CBS 117461                | MH484911                 | MH485002        | MH485093        |
| <i>F. cugenangense</i>      | CBS 620.72                | MH484879                 | MH484970        | MH485061        |
|                             | CBS 130304                | MH484921                 | MH485012        | MH485103        |
|                             | CBS 130308                | MH484920                 | MH485011        | MH485102        |
| <i>F. curvatum</i>          | CBS 247.61                | MH484876                 | MH484967        | MH485058        |
|                             | CBS 238.94 <sup>T</sup>   | MH484893                 | MH484984        | MH485075        |
|                             | CBS 141.95                | MH484894                 | MH484985        | MH485076        |
| <i>F. duoseptatum</i>       | CBS 102026                | MH484896                 | MH484987        | MH485078        |
| <i>F. elaeidis</i>          | CBS 217.49                | MH484870                 | MH484961        | MH485052        |
|                             | CBS 218.49                | MH484871                 | MH484962        | MH485053        |
|                             | CBS 255.52                | MH484874                 | MH484965        | MH485056        |
|                             | <b>ZHKUCC 22-0080</b>     | <b>ON330431</b>          | <b>ON330425</b> | <b>ON330428</b> |
|                             | <b>ZHKUCC 22-0081</b>     | <b>ON330432</b>          | <b>ON330426</b> | <b>ON330429</b> |
|                             | <b>ZHKUCC 22-0082</b>     | <b>ON330433</b>          | <b>ON330427</b> | <b>ON330430</b> |
| <i>F. fabacearum</i>        | CBS 144742                | MH484938                 | MH485029        | MH485120        |
|                             | CBS 144743                | MH484939                 | MH485030        | MH485121        |
|                             | CBS 144744                | MH484940                 | MH485031        | MH485122        |
| <i>F. foetens</i>           | CBS 120665                | MH484918                 | MH485009        | MH485100        |
| <i>F. glycines</i>          | CBS 176.33                | MH484868                 | MH484959        | MH485050        |
|                             | CBS 214.49                | MH484869                 | MH484960        | MH485051        |
|                             | CBS 200.89                | MH484888                 | MH484979        | MH485070        |
| <i>F. gossypinum</i>        | CBS 116611                | MH484907                 | MH484998        | MH485089        |
|                             | CBS 116612                | MH484908                 | MH484999        | MH485090        |
|                             | CBS 116613 <sup>T</sup>   | MH484909                 | MH485000        | MH485091        |
| <i>F. hoodiae</i>           | CBS 132474 <sup>T</sup>   | MH484929                 | MH485020        | MH485111        |
|                             | CBS 132476                | MH484930                 | MH485021        | MH485112        |
|                             | CBS 132477                | MH484931                 | MH485022        | MH485113        |
| <i>F. languescens</i>       | CBS 645.78 <sup>T</sup>   | MH484880                 | MH484971        | MH485062        |
|                             | CBS 646.78                | MH484881                 | MH484972        | MH485063        |
|                             | CBS 413.9                 | MH484890                 | MH484981        | MH485072        |
| <i>F. libertatis</i>        | CBS 144748                | MH484932                 | MH485023        | MH485114        |
|                             | CBS 144747                | MH484933                 | MH485024        | MH485115        |
|                             | CBS 144749 <sup>T</sup>   | MH484944                 | MH485035        | MH485126        |

|                       |            |          |          |          |
|-----------------------|------------|----------|----------|----------|
| <i>F.nirenbergiae</i> | CBS 129.24 | MH484864 | MH484955 | MH485046 |
|                       | CBS 149.25 | MH484865 | MH484956 | MH485047 |

**Supplementary Table 2** (Continued)

| Species name                  | Culture collection number | GenBank accession number |             |             |
|-------------------------------|---------------------------|--------------------------|-------------|-------------|
|                               |                           | <i>rpb2</i>              | <i>tefl</i> | <i>tub2</i> |
| <i>F.nirenbergiae</i>         | CBS 181.32                | MH484867                 | MH484958    | MH485049    |
|                               | CBS 758.68                | MH484877                 | MH484968    | MH485059    |
|                               | CBS 744.79                | MH484882                 | MH484973    | MH485064    |
|                               | CBS 127.81                | MH484883                 | MH484974    | MH485065    |
| <i>F.odoratissimum</i>        | CBS 794.7                 | MH484878                 | MH484969    | MH485060    |
|                               | CBS 102030                | MH484898                 | MH484989    | MH485080    |
|                               | CBS 130310                | MH484922                 | MH485013    | MH485104    |
| <i>F.oxysporum</i>            | CBS 221.49                | MH484872                 | MH484963    | MH485054    |
|                               | CBS 144134 <sup>ET</sup>  | MH484953                 | MH485044    | MH485135    |
|                               | CBS 144135                | MH484954                 | MH485045    | MH485136    |
|                               | CPC 25822                 | MH484943                 | MH485034    | MH485125    |
| <i>F.pharetrum</i>            | CBS 144750                | MH484951                 | MH485042    | MH485133    |
|                               | CBS 144751 <sup>T</sup>   | MH484952                 | MH485043    | MH485134    |
| <i>F.trachichlamydosporum</i> | CBS 102028                | MH484897                 | MH484988    | MH485079    |
| <i>F.triseptatum</i>          | CBS 258.5 <sup>T</sup>    | MH484873                 | MH484964    | MH485055    |
|                               | CBS 116619                | MH484910                 | MH485001    | MH485092    |
|                               | CBS 119665                | MH484916                 | MH485007    | MH485098    |
| <i>F.udum</i>                 | CBS 177.31                | MH484866                 | MH484957    | MH485048    |
| <i>F.veterinarium</i>         | CBS 109898 <sup>T</sup>   | MH484899                 | MH484990    | MH485081    |
|                               | CBS 117787                | MH484912                 | MH485003    | MH485094    |
|                               | CBS 117790                | MH484913                 | MH485004    | MH485095    |

The isolates obtained in this study are bold.

T=Ex-type specimen. ET=Ex-epitype specimen.
